# Supplementary figures and images for: Psychedelics and Psychedelic-Assisted Psychotherapy
Source: Atypon-hosted journal article supplement (doi:10.1176/appi.ajp.2019.19010035), 2020-02-26

# Methodology Flow Chart

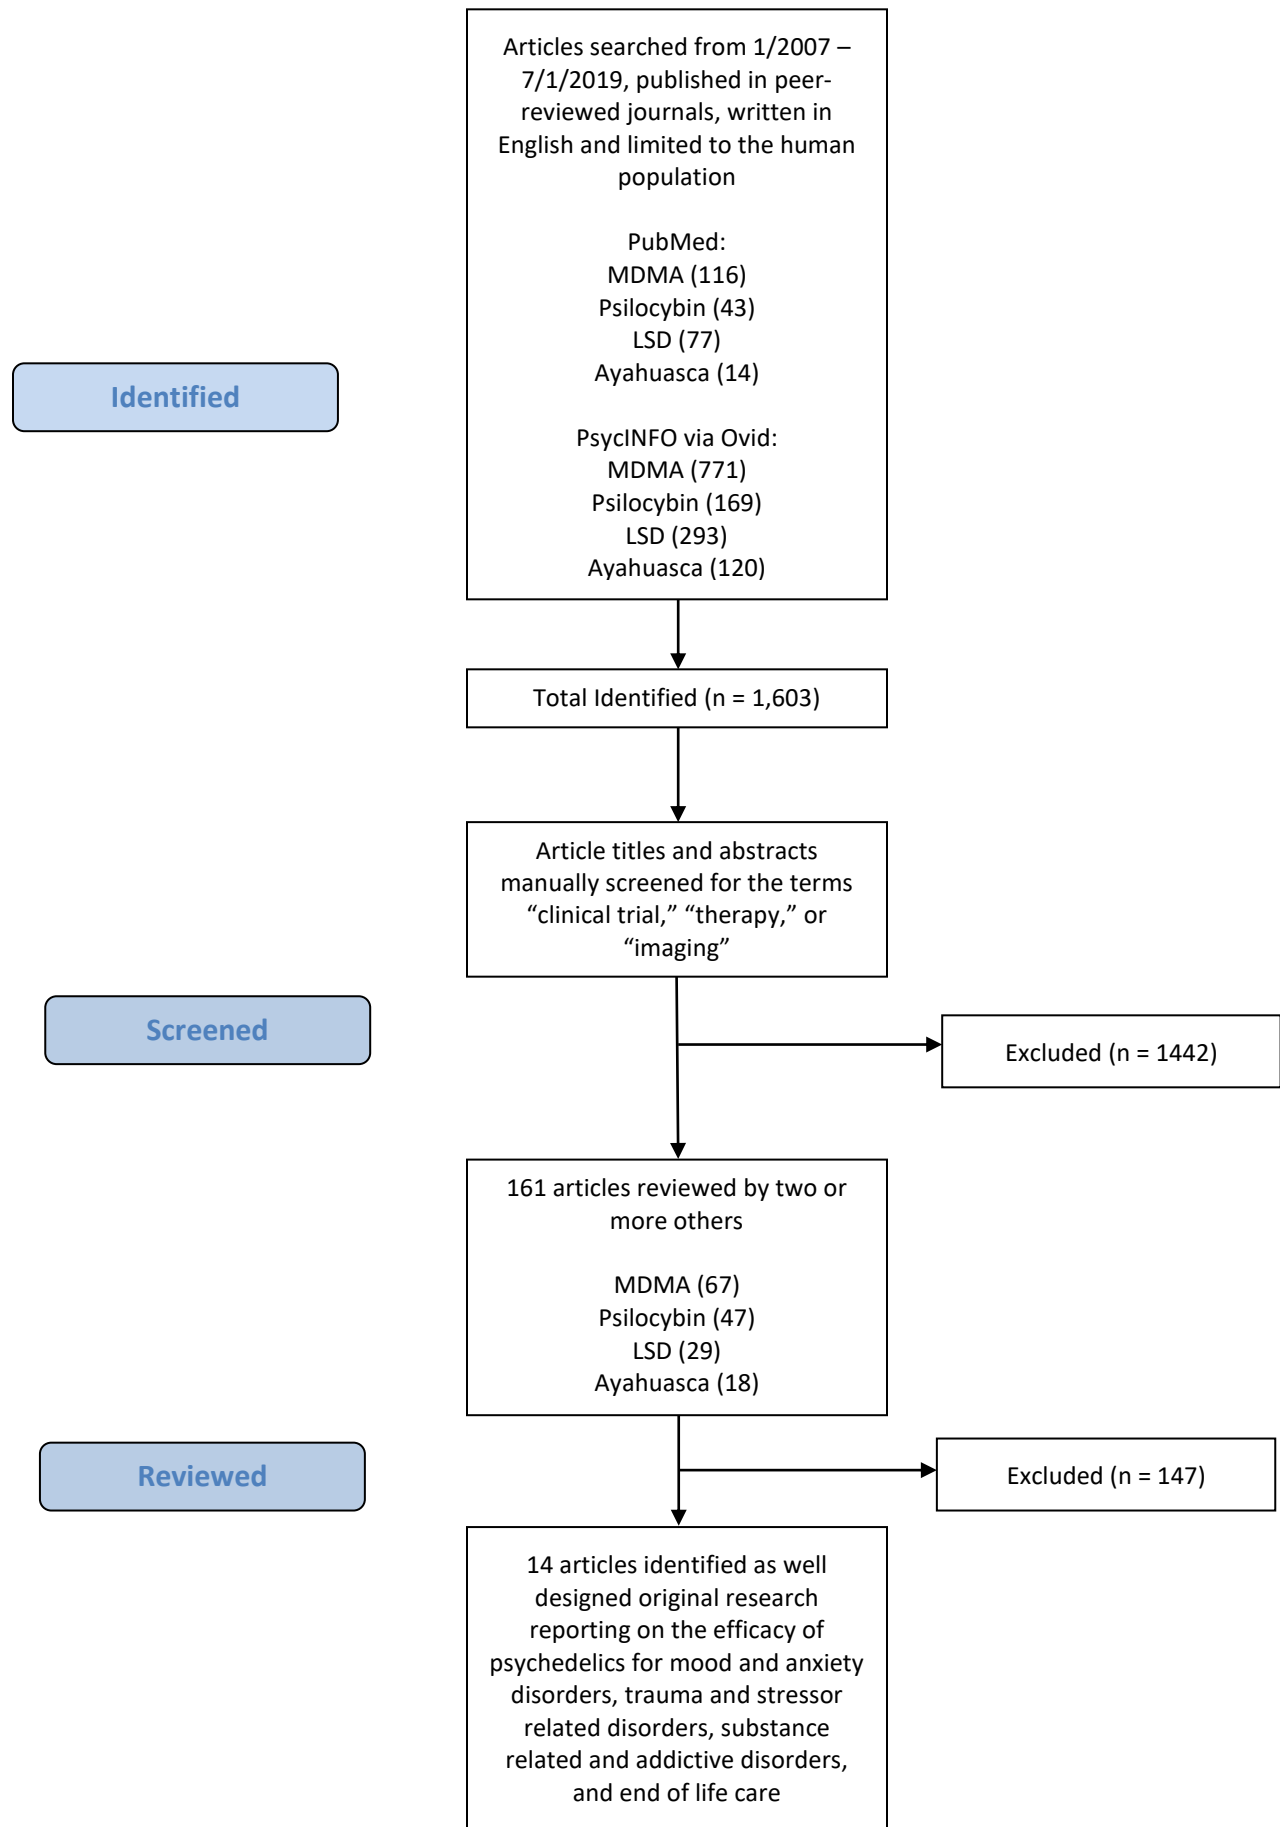

Supplement: appi.ajp.2019.19010035.ds001.pdf [file appi.ajp.2019.19010035.ds001.pdf]
